# Supplementary material
Source: PubMed Central journal article supplement (PMC3418731)
Supplement: IAI.00406-12_zii999099774so1.pdf [file IAI.00406-12_zii999099774so1.pdf]

## IFN+MAP

### Significantly Phosphorylated in IFN+MAP Treatment

| <b>Peptide</b> | <b>p-value<br/>increased<br/>phosphorylation</b> | <b>p-value<br/>decreased<br/>phosphorylation</b> | <b>Fold<br/>Change</b> |
|----------------|--------------------------------------------------|--------------------------------------------------|------------------------|
| Bad_S118       | 0.0277765                                        | 0.9722235                                        | 1.25895586             |
| CSK_Y184       | 0.03393936                                       | 0.96606064                                       | 1.2469617              |
| EphA2_Y772     | 0.0416433                                        | 0.9583567                                        | 1.18496894             |
| PKR_T446       | 0.04922419                                       | 0.95077581                                       | 1.36956644             |
| SRF_S77/79     | 0.07387082                                       | 0.92612918                                       | 1.11626273             |
| CTNNB1_Y142    | 0.09368064                                       | 0.90631936                                       | 1.32225116             |
| TrkB_Y706/7    | 0.11722524                                       | 0.88277476                                       | 1.15452532             |
| Etk_Y40        | 0.12078965                                       | 0.87921035                                       | 1.13946893             |
| PKACa_T195/7   | 0.12135841                                       | 0.87864159                                       | 1.17415416             |
| HSP70_Y525/6   | 0.1226557                                        | 0.8773443                                        | 1.12681282             |
| RIPK1_Y384/7/9 | 0.12625498                                       | 0.87374502                                       | 1.17332922             |
| CTSB_Y219      | 0.12884783                                       | 0.87115217                                       | 1.21042902             |
| CDK7_T170      | 0.14669787                                       | 0.85330213                                       | 1.11915825             |
| Crk_Y221       | 0.15143208                                       | 0.84856792                                       | 1.05657693             |
| CTNNB1_T41/45  | 0.15276719                                       | 0.84723281                                       | 1.23397758             |
| Smad3_S208     | 0.15348395                                       | 0.84651605                                       | 1.16330181             |
| HSP60_Y227     | 0.15886406                                       | 0.84113594                                       | 1.11008801             |
| NFkB-p100_S865 | 0.16449063                                       | 0.83550937                                       | 1.20754364             |
| IL-16_S143/4   | 0.16458288                                       | 0.83541712                                       | 1.17421371             |
| Met_Y1234/5    | 0.16660712                                       | 0.83339288                                       | 1.14012475             |
| EphA2_Y588     | 0.16915633                                       | 0.83084367                                       | 1.17108151             |
| EphA2_Y594     | 0.17283934                                       | 0.82716066                                       | 1.08978981             |
| LRRFIP1_S690   | 0.17477117                                       | 0.82522883                                       | 1.04691864             |
| PDGFRb_Y579/81 | 0.17511956                                       | 0.82488044                                       | 1.14114393             |
| Akt1_Y326      | 0.17536246                                       | 0.82463754                                       | 1.15715399             |
| Kit_Y721       | 0.17561163                                       | 0.82438837                                       | 1.09611284             |
| IL7R_Y449      | 0.17799963                                       | 0.82200037                                       | 1.16118079             |
| JNK2_T404/7    | 0.19278121                                       | 0.80721879                                       | 1.06581924             |
| CDK2_T14/5     | 0.19902487                                       | 0.80097513                                       | 1.14095346             |

### Significantly Dephosphorylated in IFN+MAP Treatment

|           |            |            |            |
|-----------|------------|------------|------------|
| TPH1_S58  | 0.99086418 | 0.00913582 | -1.4067558 |
| ERK2_Y205 | 0.98129683 | 0.01870317 | -1.1018525 |
| Jak3_Y981 | 0.97835585 | 0.02164415 | -1.2686522 |
| BATF_T48  | 0.97327886 | 0.02672114 | -1.2072134 |
| ERK3_S189 | 0.96349155 | 0.03650845 | -1.1748066 |

|               |            |            |            |
|---------------|------------|------------|------------|
| VEGFR3_Y1265  | 0.93727726 | 0.06272274 | -1.1762841 |
| DAPK1_S308    | 0.93491725 | 0.06508275 | -1.2486118 |
| MKP-1_S359    | 0.93421869 | 0.06578131 | -1.1339947 |
| MEK1_S217     | 0.93154602 | 0.06845398 | -1.2545042 |
| STAT2_Y690    | 0.91958873 | 0.08041127 | -1.1536919 |
| LEF-1_S166    | 0.91314771 | 0.08685229 | -1.1585481 |
| Mos_S25       | 0.91247105 | 0.08752895 | -1.3194136 |
| iNOS_Y151     | 0.91140512 | 0.08859488 | -1.1807969 |
| PKCT_Y90      | 0.90532334 | 0.09467666 | -1.1908738 |
| PKCE_S729     | 0.90243059 | 0.09756941 | -1.179423  |
| Casp3_S150    | 0.88432813 | 0.11567187 | -1.1027433 |
| Cot_S400      | 0.88385234 | 0.11614766 | -1.1831684 |
| IGF1R_Y1166   | 0.88142658 | 0.11857342 | -1.1476821 |
| Elk-1_S389    | 0.87906715 | 0.12093285 | -1.1084415 |
| Jak1_Y1022/3  | 0.8781089  | 0.1218911  | -1.1613208 |
| Fas_Y291      | 0.87033106 | 0.12966894 | -1.1866056 |
| ASK1_S966     | 0.85281004 | 0.14718996 | -1.1709725 |
| STAT3_Y705    | 0.8425866  | 0.1574134  | -1.1164437 |
| VEGFR-1_Y1169 | 0.82154647 | 0.17845353 | -1.2027472 |
| iNOS_S739     | 0.8199469  | 0.1800531  | -1.0965608 |
| FGFR4_Y754    | 0.80888614 | 0.19111386 | -1.1359882 |
| PKG1_T58      | 0.80747282 | 0.19252718 | -1.1537957 |

## IFN

### Significantly Phosphorylated in IFN Treatment

|                |            |            |            |
|----------------|------------|------------|------------|
| NFkB-p65_S276  | 0.00294412 | 0.99705588 | 1.22905074 |
| IRF-5_S437     | 0.00965269 | 0.99034731 | 1.12134725 |
| VEGFR-2_Y1214  | 0.01180219 | 0.98819781 | 1.21487159 |
| Smad3_S208     | 0.01285427 | 0.98714573 | 1.23999144 |
| Etk_Y40        | 0.01535303 | 0.98464697 | 1.13011897 |
| RIPK1_Y384/7/9 | 0.02135576 | 0.97864424 | 1.29275207 |
| PLCG1_Y783     | 0.02166427 | 0.97833573 | 1.13687442 |
| NFkB-p65_S311  | 0.02173159 | 0.97826841 | 1.25784946 |
| CBP_S2063      | 0.02404176 | 0.97595824 | 1.20276828 |
| IRAK1_T100     | 0.02756506 | 0.97243494 | 1.2031179  |
| TAK1_T184      | 0.02810742 | 0.97189258 | 1.12049787 |
| Akt1_Y326      | 0.0296532  | 0.9703468  | 1.30205613 |
| VEGFR3_Y130/1  | 0.03225388 | 0.96774612 | 1.35947435 |
| STAT3_S727     | 0.03237057 | 0.96762943 | 1.36097212 |
| PKACa_T195/7   | 0.03263069 | 0.96736931 | 1.16505468 |
| Smad1_S462/3/5 | 0.04097152 | 0.95902848 | 1.22014147 |

|                  |            |            |            |
|------------------|------------|------------|------------|
| RelB_S573        | 0.04168609 | 0.95831391 | 1.19647028 |
| Smad2_S255       | 0.04343192 | 0.95656808 | 1.2296676  |
| GSK3-beta_Y216   | 0.04389774 | 0.95610226 | 1.1488948  |
| IFNAR1_Y466      | 0.04411528 | 0.95588472 | 1.14108116 |
| STAT3_Y705       | 0.04625675 | 0.95374325 | 1.1569018  |
| MKP-1_S359       | 0.04917213 | 0.95082787 | 1.33491791 |
| NFAT1_S326       | 0.05069106 | 0.94930894 | 1.15030625 |
| STAT5B_Y699      | 0.05380367 | 0.94619633 | 1.13993544 |
| ATF-2_T51/3/5    | 0.05389689 | 0.94610311 | 1.16907093 |
| EphA2_Y588       | 0.05470002 | 0.94529998 | 1.2454737  |
| Jun_S63          | 0.05958285 | 0.94041715 | 1.33231504 |
| CSK_Y184         | 0.05963984 | 0.94036016 | 1.1492423  |
| DAPP1_Y139       | 0.06049081 | 0.93950919 | 1.15901413 |
| Btk_Y223         | 0.0614067  | 0.9385933  | 1.16268892 |
| STAT2_Y690       | 0.06217977 | 0.93782023 | 1.13253854 |
| MEK2_Y216        | 0.063318   | 0.936682   | 1.33207495 |
| STAT4_Y693       | 0.06544234 | 0.93455766 | 1.26117136 |
| GSK3-beta_S9     | 0.06660658 | 0.93339342 | 1.28364282 |
| Btk_Y551         | 0.06799186 | 0.93200814 | 1.10736661 |
| Bad_S118         | 0.06894264 | 0.93105736 | 1.1398848  |
| IL7R_Y449        | 0.07251322 | 0.92748678 | 1.15587821 |
| PLCB1_S887       | 0.07768138 | 0.92231862 | 1.0973702  |
| NFkB-p100_S865   | 0.08602286 | 0.91397714 | 1.12332201 |
| IKK-beta_Y199    | 0.08629324 | 0.91370676 | 1.22308922 |
| ERK2_Y205        | 0.08844912 | 0.91155088 | 1.12574867 |
| FADD_S194        | 0.08984969 | 0.91015031 | 1.10408692 |
| HMGA1_T52        | 0.08990062 | 0.91009938 | 1.09308845 |
| MKP-1_S323       | 0.08991214 | 0.91008786 | 1.17216484 |
| RhoA_S188        | 0.09049088 | 0.90950912 | 1.29553243 |
| p38-alpha_T180/2 | 0.09095545 | 0.90904455 | 1.09725299 |
| ERK3_S189        | 0.09400626 | 0.90599374 | 1.23261683 |
| PXN_Y31          | 0.09645627 | 0.90354373 | 1.12186634 |
| Syk_Y525/6       | 0.09743717 | 0.90256283 | 1.11670073 |
| GCAP2_S200       | 0.09796385 | 0.90203615 | 1.10348721 |
| IL-16_S143/4     | 0.10099606 | 0.89900394 | 1.20497921 |
| IRF-3_S385/6     | 0.10458099 | 0.89541901 | 1.12265549 |
| PDGFRb_Y579/81   | 0.11136465 | 0.88863535 | 1.09967245 |
| BCAP_Y281        | 0.1131217  | 0.8868783  | 1.0953967  |
| TrkB_Y706/7      | 0.11857163 | 0.88142837 | 1.08015028 |
| Smad3_S422/3/5   | 0.12250379 | 0.87749621 | 1.11895607 |
| CaMK2-           | 0.12917416 | 0.87082584 | 1.20373147 |

alpha\_T286

|                |            |            |            |
|----------------|------------|------------|------------|
| CTNNB1_T41/45  | 0.13492467 | 0.86507533 | 1.11418902 |
| IL4R_Y713      | 0.14013214 | 0.85986786 | 1.15765342 |
| HSP70_Y525/6   | 0.14657891 | 0.85342109 | 1.08666595 |
| IL1A_S87       | 0.14691007 | 0.85308993 | 1.13536862 |
| IKK-beta_Y188  | 0.15576468 | 0.84423532 | 1.10327128 |
| PKR_T451       | 0.16174434 | 0.83825566 | 1.08385676 |
| CDK2_T14/5     | 0.16596542 | 0.83403458 | 1.12656944 |
| B-Raf_T598     | 0.16618618 | 0.83381382 | 1.09039815 |
| gp130_Y767     | 0.16746176 | 0.83253824 | 1.15156972 |
| STMN1_S62      | 0.17635198 | 0.82364802 | 1.15632089 |
| PKR_T446       | 0.18198196 | 0.81801804 | 1.09296602 |
| JNK1_S377      | 0.18556795 | 0.81443205 | 1.14875367 |
| SEK1_S257/0    | 0.18676111 | 0.81323889 | 1.0803009  |
| WASP_Y291      | 0.1877837  | 0.8122163  | 1.05767998 |
| EphA2_Y772     | 0.19453657 | 0.80546343 | 1.0890281  |
| NFkB-p105_S907 | 0.19987677 | 0.80012323 | 1.10984966 |

**Significantly Dephosphorylated in IFN Treatment**

|               |            |            |            |
|---------------|------------|------------|------------|
| iNOS_S739     | 0.99903665 | 0.00096335 | -1.2356352 |
| Cdc42_Y64     | 0.99883926 | 0.00116074 | -1.2266414 |
| Fes_Y713      | 0.99773782 | 0.00226218 | -1.2802904 |
| PKCT_Y90      | 0.99730596 | 0.00269404 | -1.2927953 |
| PKCA_T637     | 0.99683637 | 0.00316363 | -1.2267412 |
| RBL2_SYMSP_NA | 0.99519752 | 0.00480248 | -1.1831218 |
| TNF-R1_S274   | 0.99461444 | 0.00538556 | -1.185385  |
| MSK2_S196     | 0.99226357 | 0.00773643 | -1.1582402 |
| FGFR1_Y463    | 0.99163324 | 0.00836676 | -1.1705461 |
| ASK1_S83      | 0.99155714 | 0.00844286 | -1.2384475 |
| DAPK1_S308    | 0.99052168 | 0.00947832 | -1.2379602 |
| Fas_Y232      | 0.99050275 | 0.00949725 | -1.1629178 |
| ADCY8_Y406    | 0.98746827 | 0.01253173 | -1.1039275 |
| JIP1_T103     | 0.98667723 | 0.01332277 | -1.1481361 |
| iNOS_S909     | 0.98413411 | 0.01586589 | -1.1977704 |
| Raf1_S499     | 0.98163056 | 0.01836944 | -1.1867526 |
| RasGAP_Y460   | 0.97781734 | 0.02218266 | -1.1055621 |
| iNOS_Y151     | 0.9733668  | 0.0266332  | -1.2584071 |
| Shc1_Y349/0   | 0.97092553 | 0.02907447 | -1.1588613 |
| TPH1_S58      | 0.96682457 | 0.03317543 | -1.2385515 |
| PKCE_S729     | 0.96443655 | 0.03556345 | -1.2128051 |
| TNFRSF5_T254  | 0.96255597 | 0.03744403 | -1.0908506 |

|                   |            |            |            |
|-------------------|------------|------------|------------|
| PKCA_S656         | 0.95835279 | 0.04164721 | -1.2196237 |
| Akt1_NA           | 0.95375583 | 0.04624417 | -1.149414  |
| VIM_S39           | 0.95345095 | 0.04654905 | -1.1455081 |
| PPARG_S112        | 0.95331872 | 0.04668128 | -1.1279212 |
| Ezrin_T566        | 0.95196726 | 0.04803274 | -1.2639728 |
| HSP60_Y227        | 0.95109103 | 0.04890897 | -1.1147203 |
| p53_S6/9          | 0.94844491 | 0.05155509 | -1.1350845 |
| SRF_S77/79        | 0.94801957 | 0.05198043 | -1.0981066 |
| Src_S74           | 0.94284659 | 0.05715341 | -1.129458  |
| CREB_S110/1       | 0.94234705 | 0.05765295 | -1.1096403 |
| CREB_S129         | 0.93710711 | 0.06289289 | -1.1244092 |
| IL-8R-B_S347      | 0.93284542 | 0.06715458 | -1.1191668 |
| MSK2_S347         | 0.9280279  | 0.0719721  | -1.058311  |
| PKG1_T58          | 0.92641627 | 0.07358373 | -1.2199888 |
| Lyn_Y507          | 0.92574113 | 0.07425887 | -1.1504613 |
| JNK3_T131         | 0.92106998 | 0.07893002 | -1.1204819 |
| BCAP_Y17          | 0.90612695 | 0.09387305 | -1.1115596 |
| VEGFR3_Y1265      | 0.87930167 | 0.12069833 | -1.0810463 |
| CCR7_T372/3/4/5/7 | 0.86819621 | 0.13180379 | -1.11406   |
| Crk_Y221          | 0.86746451 | 0.13253549 | -1.0825631 |
| PKCB_S15/T16      | 0.83766601 | 0.16233399 | -1.1081156 |
| p70S6Kb_S473/4    | 0.82676275 | 0.17323725 | -1.0923907 |
| LRRFIP1_S497      | 0.81489519 | 0.18510481 | -1.0649962 |
| CSFR_Y561         | 0.81234443 | 0.18765557 | -1.0625892 |
| LEF-1_S166        | 0.81173567 | 0.18826433 | -1.0548798 |
| Fas_Y291          | 0.8084845  | 0.1915155  | -1.1072702 |

## MAP Infected

### Significantly Phosphorylated in MAP Infected

|                |            |            |            |
|----------------|------------|------------|------------|
| GSK3-beta_S9   | 0.00245478 | 0.99754522 | 1.26775014 |
| CDK7_T170      | 0.00265857 | 0.99734143 | 1.24801162 |
| CSK_Y184       | 0.00422129 | 0.99577871 | 1.18670573 |
| STMN1_S62      | 0.00505407 | 0.99494593 | 1.35103504 |
| RIPK1_Y384/7/9 | 0.00879566 | 0.99120434 | 1.37559582 |
| MEK2_Y216      | 0.01108024 | 0.98891976 | 1.42962592 |
| Akt1_Y326      | 0.01165393 | 0.98834607 | 1.38006474 |
| IRAK1_T100     | 0.01423535 | 0.98576465 | 1.25721463 |
| Smad3_S422/3/5 | 0.0146491  | 0.9853509  | 1.29601038 |
| Btk_Y223       | 0.0184223  | 0.9815777  | 1.29725837 |
| Smad3_S208     | 0.02243614 | 0.97756386 | 1.48680823 |
| Etk_Y40        | 0.02923327 | 0.97076673 | 1.19946028 |

|                  |            |            |            |
|------------------|------------|------------|------------|
| P38-gamma_T183/5 | 0.03035747 | 0.96964253 | 1.18575352 |
| NFAT1_S326       | 0.03087256 | 0.96912744 | 1.27663456 |
| NFkB-p100_S865   | 0.03274152 | 0.96725848 | 1.31002125 |
| p47phox_S370     | 0.04154038 | 0.95845962 | 1.45683016 |
| Smad1_S462/3/5   | 0.04220737 | 0.95779263 | 1.47659811 |
| CTNNB1_T41/45    | 0.04556136 | 0.95443864 | 1.21038838 |
| PLCG1_Y783       | 0.04738578 | 0.95261422 | 1.17382752 |
| NFkB-p65_S276    | 0.05058436 | 0.94941564 | 1.27894002 |
| ATF-2_T51/3/5    | 0.053564   | 0.946436   | 1.30121677 |
| TrkB_Y706/7      | 0.0539592  | 0.9460408  | 1.15634165 |
| JNK1_S377        | 0.05901243 | 0.94098757 | 1.15692593 |
| CTNNB1_Y142      | 0.06406247 | 0.93593753 | 1.16581079 |
| Casp3_S150       | 0.06521347 | 0.93478653 | 1.14328124 |
| HMGA1_T52        | 0.07390078 | 0.92609922 | 1.23364072 |
| STAT5B_Y699      | 0.07434444 | 0.92565556 | 1.15330765 |
| Rb_S795          | 0.0856667  | 0.9143333  | 1.18255647 |
| GCAP2_S200       | 0.08611309 | 0.91388691 | 1.21565958 |
| FGFR1_Y154       | 0.08878415 | 0.91121585 | 1.22710776 |
| IKK-beta_Y199    | 0.09186199 | 0.90813801 | 1.20571025 |
| CDK2_T160        | 0.0930423  | 0.9069577  | 1.18799283 |
| PXN_Y31          | 0.09469521 | 0.90530479 | 1.09310144 |
| Bad_S118         | 0.10248854 | 0.89751146 | 1.1468493  |
| Daxx_S668/71     | 0.10513768 | 0.89486232 | 1.40495531 |
| NFkB-p65_S311    | 0.11023734 | 0.88976266 | 1.28049058 |
| CSFR_Y809        | 0.11094559 | 0.88905441 | 1.0665122  |
| JNK2_S129        | 0.11928934 | 0.88071066 | 1.17946174 |
| PKR_T446         | 0.1222167  | 0.8777833  | 1.2114064  |
| TrkC_Y516        | 0.12374757 | 0.87625243 | 1.2542774  |
| MKP-1_S323       | 0.12421973 | 0.87578027 | 1.15544955 |
| PKACa_T195/7     | 0.13738104 | 0.86261896 | 1.13808079 |
| CDK2_T14/5       | 0.14086623 | 0.85913377 | 1.17067789 |
| IRF-5_S437       | 0.1417829  | 0.8582171  | 1.09684449 |
| PLCB1_S887       | 0.15067749 | 0.84932251 | 1.13213668 |
| TAK1_T184        | 0.15566871 | 0.84433129 | 1.09051792 |
| gp130_Y767       | 0.16094855 | 0.83905145 | 1.16899732 |
| Smad2_S255       | 0.16163501 | 0.83836499 | 1.17966447 |
| STAT4_Y693       | 0.17065756 | 0.82934244 | 1.17745393 |
| IL-16_S143/4     | 0.17455752 | 0.82544248 | 1.18980598 |
| IL7R_Y449        | 0.17634568 | 0.82365432 | 1.17916168 |
| ATF-2_S44        | 0.19053343 | 0.80946657 | 1.09847725 |
| p38-alpha_T180/2 | 0.19075038 | 0.80924962 | 1.084703   |

|                |            |            |            |
|----------------|------------|------------|------------|
| EphA2_Y588     | 0.19231051 | 0.80768949 | 1.14937752 |
| NFkB-p105_S907 | 0.19329926 | 0.80670074 | 1.14740605 |
| IFNGR1_Y479    | 0.19592036 | 0.80407964 | 1.09271763 |
| RhoA_S188      | 0.19876957 | 0.80123043 | 1.20878538 |

### Significantly Dephosphorylated in MAP Infected

|                 |            |            |            |
|-----------------|------------|------------|------------|
| iNOS_Y151       | 0.99944865 | 0.00055135 | -1.4319726 |
| PKCA_S656       | 0.99846187 | 0.00153813 | -1.3399799 |
| SRF_S77/79      | 0.9975641  | 0.0024359  | -1.1181275 |
| RasGAP_Y460     | 0.98982897 | 0.01017103 | -1.1173616 |
| IkB-beta_T19/23 | 0.98911791 | 0.01088209 | -1.1186795 |
| Fes_Y713        | 0.98741374 | 0.01258626 | -1.1121353 |
| p53_S6/9        | 0.98455648 | 0.01544352 | -1.1338648 |
| TPH1_S58        | 0.98336848 | 0.01663152 | -1.3006108 |
| PKCT_Y90        | 0.98327644 | 0.01672356 | -1.3882393 |
| DAPK1_S308      | 0.98240672 | 0.01759328 | -1.3952159 |
| Cdc42_Y64       | 0.97997603 | 0.02002397 | -1.2446797 |
| CREB_S129       | 0.97856644 | 0.02143356 | -1.1406109 |
| MSK2_S196       | 0.97680468 | 0.02319532 | -1.2399964 |
| TNFRSF5_T254    | 0.97200063 | 0.02799937 | -1.156617  |
| iNOS_S909       | 0.96973302 | 0.03026698 | -1.2474244 |
| Mos_S25         | 0.96914357 | 0.03085643 | -1.2063708 |
| PPARG_S112      | 0.96664823 | 0.03335177 | -1.1539541 |
| iNOS_S739       | 0.95687059 | 0.04312941 | -1.2382111 |
| ASK1_S83        | 0.94635751 | 0.05364249 | -1.1550218 |
| Akt1_NA         | 0.94348635 | 0.05651365 | -1.1624275 |
| BCAP_Y17        | 0.94328186 | 0.05671814 | -1.1637276 |
| Shc1_Y349/0     | 0.92432198 | 0.07567802 | -1.1018488 |
| PIK3R1_S608/7   | 0.92009274 | 0.07990726 | -1.1575963 |
| Fas_Y232        | 0.90875269 | 0.09124731 | -1.1780698 |
| Crk_Y221        | 0.90597553 | 0.09402447 | -1.100605  |
| MSK2_S347       | 0.90384498 | 0.09615502 | -1.1165659 |
| JIP1_T103       | 0.8999439  | 0.1000561  | -1.1177703 |
| Jak1_Y1022/3    | 0.89980639 | 0.10019361 | -1.2069889 |
| Jak3_Y981       | 0.88907428 | 0.11092572 | -1.1515821 |
| CSFR_Y561       | 0.87824703 | 0.12175297 | -1.0596644 |
| SOD1_S98        | 0.87199408 | 0.12800592 | -1.1027865 |
| Nik_T559        | 0.86490083 | 0.13509917 | -1.0976635 |
| Jak2_Y1007/8    | 0.85725584 | 0.14274416 | -1.1114292 |
| ROCK2_S1134/7   | 0.85674812 | 0.14325188 | -1.0740553 |
| LEF-1_S166      | 0.85506734 | 0.14493266 | -1.0554814 |

|                   |            |            |            |
|-------------------|------------|------------|------------|
| ASK1_S966         | 0.84846337 | 0.15153663 | -1.1258864 |
| Cdc25A_S82        | 0.84471739 | 0.15528261 | -1.1263066 |
| IGF1R_Y1166       | 0.84241423 | 0.15758577 | -1.092254  |
| PDGFRb_Y740       | 0.83743769 | 0.16256231 | -1.0873279 |
| NFAT4_S163/5      | 0.83716892 | 0.16283108 | -1.1191001 |
| PKCA_T637         | 0.83591377 | 0.16408623 | -1.101971  |
| Notch-2_S2070     | 0.82321363 | 0.17678637 | -1.0729412 |
| CCR7_T372/3/4/5/7 | 0.81153847 | 0.18846153 | -1.0773104 |
| FGFR3_Y760        | 0.80874106 | 0.19125894 | -1.1098933 |
| HIF2A_T840        | 0.80848294 | 0.19151706 | -1.0672158 |
| RAC1_S71          | 0.80786718 | 0.19213282 | -1.0913569 |

**Table S1: Differential peptides from MAP kinome identified by one-sided paired *t*-test.** The 200 consistently phosphorylated peptides identified by the *F*-tests were subjected to one-sided paired *t*-test to identify significantly phosphorylated or dephosphorylated peptides in treatments IFN, MAP+IFN, and MAP relative to the Mono control (no treatment). For each of these peptides, the responses from all three animals were pooled to increase the statistical confidence. Only the peptides with *p*-values less than 0.20 are shown here. The first column contains the common names of the corresponding proteins for the peptides and the phosphorylation sites separated by underscores. The second column includes the *p*-values for increased phosphorylation of the peptide relative to control. The third column includes the *p*-values for decreased phosphorylation of the peptide relative to control. The fourth column includes the phosphorylation fold change relative to control.

|             | IFN+MAP vs Mono |               |       | IFN vs Mono |               |       | MAP vs Mono |               |       |
|-------------|-----------------|---------------|-------|-------------|---------------|-------|-------------|---------------|-------|
|             | <i>p</i> up     | <i>p</i> down | FC    | <i>p</i> up | <i>p</i> down | FC    | <i>p</i> up | <i>P</i> down | FC    |
| 4E-BP1_T37  | 0.36            | 0.64          | 1.05  | 0.74        | 0.26          | -1.07 | 0.74        | 0.26          | -1.10 |
| 4E-BP1_T46  | 0.07            | 0.93          | 1.23  | 0.44        | 0.56          | 1.01  | 0.23        | 0.77          | 1.10  |
| ADCY8_Y406  | 0.78            | 0.22          | -1.09 | 0.99        | 0.01          | -1.10 | 0.60        | 0.40          | -1.03 |
| Akt1_T308   | 0.79            | 0.21          | -1.08 | 0.95        | 0.05          | -1.15 | 0.94        | 0.06          | -1.16 |
| Akt1_S473   | 0.44            | 0.56          | 1.02  | 0.62        | 0.38          | -1.02 | 0.70        | 0.30          | -1.04 |
| Akt1_S124/9 | 0.51            | 0.49          | -1.01 | 0.61        | 0.39          | -1.04 | 0.55        | 0.45          | -1.02 |
| Akt1_Y326   | 0.18            | 0.82          | 1.16  | 0.03        | 0.97          | 1.30  | 0.01        | 0.99          | 1.38  |
| Akt3_S120   | 0.40            | 0.60          | 1.03  | 0.46        | 0.54          | 1.01  | 0.66        | 0.34          | -1.04 |
| Akt3_T447   | 0.26            | 0.74          | 1.15  | 0.11        | 0.89          | 1.17  | 0.36        | 0.64          | 1.05  |
| APE1_S289   | 0.94            | 0.06          | -1.25 | 0.85        | 0.15          | -1.19 | 0.97        | 0.03          | -1.32 |
| Aplp1_Y643  | 0.88            | 0.12          | -1.33 | 0.16        | 0.84          | 1.10  | 0.39        | 0.61          | 1.03  |
| ApoE_S314   | 0.49            | 0.51          | 1.00  | 1.00        | 0.00          | -1.27 | 0.59        | 0.41          | -1.04 |
| A-Raf_Y301  | 0.25            | 0.75          | 1.09  | 0.28        | 0.72          | 1.02  | 0.48        | 0.52          | 1.00  |
| ASK1_S1033  | 0.74            | 0.26          | -1.08 | 0.99        | 0.01          | -1.23 | 0.64        | 0.36          | -1.03 |



|                   |      |      |       |      |      |       |      |      |       |
|-------------------|------|------|-------|------|------|-------|------|------|-------|
| ASK1_S83          | 0.71 | 0.29 | -1.07 | 0.99 | 0.01 | -1.24 | 0.95 | 0.05 | -1.16 |
| ASK1_S966         | 0.85 | 0.15 | -1.17 | 0.27 | 0.73 | 1.06  | 0.85 | 0.15 | -1.13 |
| ATF-2_S44         | 0.38 | 0.62 | 1.05  | 0.40 | 0.60 | 1.02  | 0.19 | 0.81 | 1.10  |
| ATF-2_T51/3/5     | 0.53 | 0.47 | -1.02 | 0.05 | 0.95 | 1.17  | 0.05 | 0.95 | 1.30  |
| ATF-4_S245        | 0.54 | 0.46 | -1.03 | 0.03 | 0.97 | 1.39  | 0.05 | 0.95 | 1.60  |
| axin-1_S486       | 0.70 | 0.30 | -1.05 | 0.52 | 0.48 | -1.00 | 0.46 | 0.54 | 1.01  |
| Bad_S118          | 0.03 | 0.97 | 1.26  | 0.07 | 0.93 | 1.14  | 0.10 | 0.90 | 1.15  |
| BATF_T48          | 0.97 | 0.03 | -1.21 | 0.79 | 0.21 | -1.08 | 0.71 | 0.29 | -1.07 |
| BCAP_Y17          | 0.69 | 0.31 | -1.06 | 0.91 | 0.09 | -1.11 | 0.94 | 0.06 | -1.16 |
| BCAP_Y281         | 0.38 | 0.62 | 1.03  | 0.11 | 0.89 | 1.10  | 0.27 | 0.73 | 1.03  |
| Bcl-2_S70         | 0.47 | 0.53 | 1.03  | 0.04 | 0.96 | 1.26  | 0.01 | 0.99 | 1.68  |
| Bcl-2_T56         | 0.42 | 0.58 | 1.04  | 0.42 | 0.58 | 1.02  | 0.03 | 0.97 | 1.35  |
| Bid_T59           | 0.52 | 0.48 | -1.01 | 0.95 | 0.05 | -1.12 | 0.93 | 0.07 | -1.11 |
| BLNK_Y72          | 0.34 | 0.66 | 1.04  | 0.25 | 0.75 | 1.04  | 0.67 | 0.33 | -1.03 |
| BLNK_Y96          | 0.79 | 0.21 | -1.10 | 0.13 | 0.87 | 1.10  | 0.70 | 0.30 | -1.04 |
| B-Raf_T598        | 0.59 | 0.41 | -1.04 | 0.17 | 0.83 | 1.09  | 0.28 | 0.72 | 1.09  |
| Btk_Y223          | 0.49 | 0.51 | 1.00  | 0.06 | 0.94 | 1.16  | 0.02 | 0.98 | 1.30  |
| Btk_Y551          | 0.25 | 0.75 | 1.08  | 0.07 | 0.93 | 1.11  | 0.22 | 0.78 | 1.08  |
| Calmodulin_Y99    | 0.12 | 0.88 | 1.14  | 0.53 | 0.47 | -1.01 | 0.64 | 0.36 | -1.02 |
| CaMK2-alpha_T286  | 0.76 | 0.24 | -1.09 | 0.13 | 0.87 | 1.20  | 0.31 | 0.69 | 1.07  |
| Casp3_S150        | 0.88 | 0.12 | -1.10 | 0.41 | 0.59 | 1.01  | 0.07 | 0.93 | 1.14  |
| Casp8_S347        | 0.94 | 0.06 | -1.18 | 0.15 | 0.85 | 1.08  | 0.51 | 0.49 | -1.00 |
| caveolin-1_Y14    | 0.58 | 0.42 | -1.01 | 0.93 | 0.07 | -1.13 | 1.00 | 0.00 | -1.21 |
| Cbl_Y371          | 0.80 | 0.20 | -1.14 | 0.91 | 0.09 | -1.11 | 0.90 | 0.10 | -1.14 |
| CBP_S2063         | 0.74 | 0.26 | -1.09 | 0.02 | 0.98 | 1.20  | 0.54 | 0.46 | -1.01 |
| CCR2_Y139         | 0.53 | 0.47 | -1.01 | 0.31 | 0.69 | 1.09  | 0.30 | 0.70 | 1.10  |
| CCR5_S336/7       | 0.89 | 0.11 | -1.15 | 0.84 | 0.16 | -1.12 | 0.96 | 0.04 | -1.32 |
| CCR7_S356/7       | 0.82 | 0.18 | -1.19 | 0.83 | 0.17 | -1.13 | 0.76 | 0.24 | -1.14 |
| CCR7_T372/3/4/5/7 | 0.78 | 0.22 | -1.07 | 0.87 | 0.13 | -1.11 | 0.81 | 0.19 | -1.08 |
| CD28_Y206/9       | 0.28 | 0.72 | 1.08  | 0.40 | 0.60 | 1.02  | 0.27 | 0.73 | 1.11  |
| CD45_S999/02/03   | 0.27 | 0.73 | 1.14  | 0.94 | 0.06 | -1.16 | 0.99 | 0.01 | -1.22 |
| CD45_Y1216        | 0.49 | 0.51 | 1.00  | 0.95 | 0.05 | -1.17 | 0.81 | 0.19 | -1.09 |
| Cdc25A_S82        | 0.27 | 0.73 | 1.09  | 0.69 | 0.31 | -1.05 | 0.84 | 0.16 | -1.13 |
| Cdc25A_S88        | 0.60 | 0.40 | -1.05 | 0.21 | 0.79 | 1.11  | 0.66 | 0.34 | -1.05 |
| Cdc42_Y64         | 0.76 | 0.24 | -1.07 | 1.00 | 0.00 | -1.23 | 0.98 | 0.02 | -1.24 |
| CDK2_T14/5        | 0.20 | 0.80 | 1.14  | 0.17 | 0.83 | 1.13  | 0.14 | 0.86 | 1.17  |
| CDK2_T160         | 0.39 | 0.61 | 1.03  | 0.24 | 0.76 | 1.10  | 0.09 | 0.91 | 1.19  |
| CDK7_T170         | 0.15 | 0.85 | 1.12  | 0.29 | 0.71 | 1.06  | 0.00 | 1.00 | 1.25  |
| Cot_S400          | 0.88 | 0.12 | -1.18 | 0.34 | 0.66 | 1.07  | 0.64 | 0.36 | -1.08 |
| CREB_S110/1       | 0.22 | 0.78 | 1.07  | 0.94 | 0.06 | -1.11 | 0.69 | 0.31 | -1.03 |
| CREB_S129         | 0.58 | 0.42 | -1.02 | 0.94 | 0.06 | -1.12 | 0.98 | 0.02 | -1.14 |

|                 |      |      |       |      |      |       |      |      |       |
|-----------------|------|------|-------|------|------|-------|------|------|-------|
| Crk_Y221        | 0.15 | 0.85 | 1.06  | 0.87 | 0.13 | -1.08 | 0.91 | 0.09 | -1.10 |
| CSFR_Y561       | 0.24 | 0.76 | 1.04  | 0.81 | 0.19 | -1.06 | 0.88 | 0.12 | -1.06 |
| CSFR_Y809       | 0.23 | 0.77 | 1.07  | 0.76 | 0.24 | -1.04 | 0.11 | 0.89 | 1.07  |
| CSK_Y184        | 0.03 | 0.97 | 1.25  | 0.06 | 0.94 | 1.15  | 0.00 | 1.00 | 1.19  |
| CTLA-4_Y201     | 0.70 | 0.30 | -1.08 | 0.36 | 0.64 | 1.05  | 0.39 | 0.61 | 1.04  |
| CTNNB1_S675     | 0.22 | 0.78 | 1.04  | 0.90 | 0.10 | -1.12 | 0.98 | 0.02 | -1.20 |
| CTNNB1_T41/45   | 0.15 | 0.85 | 1.23  | 0.13 | 0.87 | 1.11  | 0.05 | 0.95 | 1.21  |
| CTNNB1_Y142     | 0.09 | 0.91 | 1.32  | 0.26 | 0.74 | 1.04  | 0.06 | 0.94 | 1.17  |
| CTSB_Y219       | 0.13 | 0.87 | 1.21  | 0.36 | 0.64 | 1.03  | 0.44 | 0.56 | 1.02  |
| CXCR4_Y157      | 0.22 | 0.78 | 1.13  | 0.25 | 0.75 | 1.11  | 0.23 | 0.77 | 1.13  |
| cyclinD1_T286/8 | 0.41 | 0.59 | 1.03  | 0.34 | 0.66 | 1.05  | 0.35 | 0.65 | 1.05  |
| cyclinE1_T395   | 0.35 | 0.65 | 1.14  | 0.30 | 0.70 | 1.07  | 0.03 | 0.97 | 1.66  |
| CystatinS_S132  | 0.29 | 0.71 | 1.10  | 0.91 | 0.09 | -1.12 | 0.54 | 0.46 | -1.02 |
| DAPK1_S308      | 0.93 | 0.07 | -1.25 | 0.99 | 0.01 | -1.24 | 0.98 | 0.02 | -1.40 |
| DAPK1_S735      | 0.31 | 0.69 | 1.11  | 0.87 | 0.13 | -1.11 | 0.37 | 0.63 | 1.09  |
| DAPK3_T180      | 0.56 | 0.44 | -1.02 | 0.33 | 0.67 | 1.03  | 0.75 | 0.25 | -1.06 |
| DAPK3_T225      | 0.00 | 1.00 | 1.35  | 0.37 | 0.63 | 1.02  | 0.00 | 1.00 | 1.21  |
| DAPP1_Y139      | 0.50 | 0.50 | -1.00 | 0.06 | 0.94 | 1.16  | 0.38 | 0.62 | 1.05  |
| Daxx_S668/71    | 0.54 | 0.46 | -1.02 | 0.51 | 0.49 | -1.01 | 0.11 | 0.89 | 1.40  |
| DNA-PK_T2609    | 0.50 | 0.50 | 1.00  | 0.19 | 0.81 | 1.11  | 0.42 | 0.58 | 1.02  |
| DNA-PK_T2638    | 0.48 | 0.52 | 1.01  | 0.43 | 0.57 | 1.02  | 0.09 | 0.91 | 1.19  |
| Elk-1_S389      | 0.88 | 0.12 | -1.11 | 0.32 | 0.68 | 1.05  | 0.31 | 0.69 | 1.07  |
| Elk-1_T417      | 0.57 | 0.43 | -1.03 | 0.04 | 0.96 | 1.28  | 0.34 | 0.66 | 1.07  |
| eNOS_S1176      | 0.33 | 0.67 | 1.07  | 0.13 | 0.87 | 1.09  | 0.04 | 0.96 | 1.35  |
| EphA1_Y781      | 0.24 | 0.76 | 1.09  | 0.59 | 0.41 | -1.02 | 0.51 | 0.49 | -1.00 |
| EphA2_Y588      | 0.17 | 0.83 | 1.17  | 0.05 | 0.95 | 1.25  | 0.19 | 0.81 | 1.15  |
| EphA2_Y594      | 0.17 | 0.83 | 1.09  | 0.30 | 0.70 | 1.02  | 0.54 | 0.46 | -1.01 |
| EphA2_Y772      | 0.04 | 0.96 | 1.18  | 0.19 | 0.81 | 1.09  | 0.20 | 0.80 | 1.18  |
| ERK1_T202/4     | 0.70 | 0.30 | -1.07 | 0.40 | 0.60 | 1.02  | 0.62 | 0.38 | -1.02 |
| ERK2_Y205       | 0.98 | 0.02 | -1.10 | 0.09 | 0.91 | 1.13  | 0.37 | 0.63 | 1.03  |
| ERK3_S189       | 0.96 | 0.04 | -1.17 | 0.09 | 0.91 | 1.23  | 0.32 | 0.68 | 1.07  |
| Etk_Y40         | 0.12 | 0.88 | 1.14  | 0.02 | 0.98 | 1.13  | 0.03 | 0.97 | 1.20  |
| Ezrin_T566      | 0.45 | 0.55 | 1.01  | 0.95 | 0.05 | -1.26 | 0.62 | 0.38 | -1.03 |
| FADD_S194       | 0.40 | 0.60 | 1.02  | 0.09 | 0.91 | 1.10  | 0.34 | 0.66 | 1.03  |
| FADD_NA         | 0.11 | 0.89 | 1.09  | 0.98 | 0.02 | -1.22 | 0.51 | 0.49 | -1.00 |
| FAK_Y397        | 0.42 | 0.58 | 1.02  | 0.60 | 0.40 | -1.01 | 0.63 | 0.37 | -1.03 |
| Fas_Y232        | 0.52 | 0.48 | -1.01 | 0.99 | 0.01 | -1.16 | 0.91 | 0.09 | -1.18 |
| Fas_Y291        | 0.87 | 0.13 | -1.19 | 0.81 | 0.19 | -1.11 | 0.43 | 0.57 | 1.02  |
| Fes_Y713        | 0.57 | 0.43 | -1.01 | 1.00 | 0.00 | -1.28 | 0.99 | 0.01 | -1.11 |
| FGFR1_Y154      | 0.51 | 0.49 | -1.00 | 0.36 | 0.64 | 1.02  | 0.09 | 0.91 | 1.23  |
| FGFR1_Y463      | 0.45 | 0.55 | 1.01  | 0.99 | 0.01 | -1.17 | 0.67 | 0.33 | -1.04 |

|                  |      |      |       |      |      |       |      |      |       |
|------------------|------|------|-------|------|------|-------|------|------|-------|
| FGFR1_Y653/4     | 0.30 | 0.70 | 1.07  | 0.44 | 0.56 | 1.01  | 0.36 | 0.64 | 1.03  |
| FGFR3_Y724       | 0.21 | 0.79 | 1.09  | 0.50 | 0.50 | 1.00  | 0.27 | 0.73 | 1.04  |
| FGFR3_Y760       | 0.75 | 0.25 | -1.11 | 0.70 | 0.30 | -1.06 | 0.81 | 0.19 | -1.11 |
| FGFR4_Y754       | 0.81 | 0.19 | -1.14 | 0.62 | 0.38 | -1.02 | 0.67 | 0.33 | -1.05 |
| FLGE_ECOLI_NA    | 0.15 | 0.85 | 1.10  | 0.70 | 0.30 | -1.04 | 0.99 | 0.01 | -1.13 |
| FLT3_Y589/91     | 0.47 | 0.53 | 1.01  | 0.43 | 0.57 | 1.03  | 0.50 | 0.50 | -1.00 |
| FLT3_Y597/9      | 0.38 | 0.62 | 1.04  | 0.76 | 0.24 | -1.05 | 0.45 | 0.55 | 1.02  |
| Fos_T232         | 0.67 | 0.33 | -1.05 | 0.11 | 0.89 | 1.15  | 0.59 | 0.41 | -1.03 |
| FRS2_Y196        | 0.48 | 0.52 | 1.01  | 0.55 | 0.45 | -1.01 | 0.60 | 0.40 | -1.02 |
| FRS2_Y436        | 0.88 | 0.12 | -1.15 | 0.91 | 0.09 | -1.18 | 0.91 | 0.09 | -1.18 |
| FRS3_Y416        | 0.61 | 0.39 | -1.04 | 0.86 | 0.14 | -1.13 | 0.95 | 0.05 | -1.21 |
| Fyn_Y420         | 0.46 | 0.54 | 1.00  | 0.64 | 0.36 | -1.02 | 0.76 | 0.24 | -1.03 |
| Fyn_Y531         | 0.27 | 0.73 | 1.04  | 0.96 | 0.04 | -1.16 | 1.00 | 0.00 | -1.15 |
| GCAP2_S200       | 0.74 | 0.26 | -1.12 | 0.10 | 0.90 | 1.10  | 0.09 | 0.91 | 1.22  |
| gp130_S782       | 0.33 | 0.67 | 1.04  | 0.14 | 0.86 | 1.14  | 0.36 | 0.64 | 1.04  |
| gp130_Y767       | 0.35 | 0.65 | 1.06  | 0.17 | 0.83 | 1.15  | 0.16 | 0.84 | 1.17  |
| gp130_Y814       | 0.36 | 0.64 | 1.03  | 0.45 | 0.55 | 1.01  | 0.22 | 0.78 | 1.09  |
| Grb10_S150       | 0.72 | 0.28 | -1.06 | 0.15 | 0.85 | 1.09  | 0.66 | 0.34 | -1.04 |
| Grb2_Y209        | 0.58 | 0.42 | -1.03 | 0.69 | 0.31 | -1.04 | 0.37 | 0.63 | 1.06  |
| GSK3-beta_S9     | 0.65 | 0.35 | -1.05 | 0.07 | 0.93 | 1.28  | 0.00 | 1.00 | 1.27  |
| GSK3-beta_Y216   | 0.55 | 0.45 | -1.02 | 0.04 | 0.96 | 1.15  | 0.31 | 0.69 | 1.06  |
| HIF1A_T796       | 0.35 | 0.65 | 1.04  | 0.60 | 0.40 | -1.02 | 0.89 | 0.11 | -1.13 |
| HIF2A_T840       | 0.66 | 0.34 | -1.05 | 0.54 | 0.46 | -1.01 | 0.81 | 0.19 | -1.07 |
| HMGA1_T52        | 0.34 | 0.66 | 1.09  | 0.09 | 0.91 | 1.09  | 0.07 | 0.93 | 1.23  |
| H-Ras-1_T35      | 0.72 | 0.28 | -1.07 | 0.98 | 0.02 | -1.25 | 0.96 | 0.04 | -1.22 |
| HSP27_S78/82/3   | 0.64 | 0.36 | -1.07 | 0.19 | 0.81 | 1.12  | 0.12 | 0.88 | 1.19  |
| HSP60_Y227       | 0.16 | 0.84 | 1.11  | 0.95 | 0.05 | -1.11 | 0.31 | 0.69 | 1.04  |
| HSP70_Y525/6     | 0.12 | 0.88 | 1.13  | 0.15 | 0.85 | 1.09  | 0.28 | 0.72 | 1.06  |
| IFNAR1_S535      | 0.59 | 0.41 | -1.04 | 0.75 | 0.25 | -1.07 | 0.72 | 0.28 | -1.07 |
| IFNAR1_Y466      | 0.77 | 0.23 | -1.17 | 0.04 | 0.96 | 1.14  | 0.33 | 0.67 | 1.07  |
| IFNGR1_Y457      | 0.73 | 0.27 | -1.07 | 0.26 | 0.74 | 1.09  | 0.57 | 0.43 | -1.02 |
| IFNGR1_Y479      | 0.53 | 0.47 | -1.01 | 0.24 | 0.76 | 1.08  | 0.20 | 0.80 | 1.09  |
| IGF1R_Y1166      | 0.88 | 0.12 | -1.15 | 0.28 | 0.72 | 1.07  | 0.84 | 0.16 | -1.09 |
| IkB-alpha_S32/36 | 0.41 | 0.59 | 1.03  | 0.99 | 0.01 | -1.21 | 1.00 | 0.00 | -1.32 |
| IkB-alpha_Y42    | 0.60 | 0.40 | -1.03 | 0.89 | 0.11 | -1.12 | 0.75 | 0.25 | -1.05 |
| IkB-beta_S313/15 | 0.09 | 0.91 | 1.19  | 0.64 | 0.36 | -1.02 | 0.89 | 0.11 | -1.06 |
| IkB-beta_T19/23  | 0.68 | 0.32 | -1.07 | 0.68 | 0.32 | -1.03 | 0.99 | 0.01 | -1.12 |
| IKK-alpha_T23    | 0.22 | 0.78 | 1.07  | 0.66 | 0.34 | -1.03 | 0.74 | 0.26 | -1.04 |
| IKK-beta_Y188    | 0.73 | 0.27 | -1.08 | 0.16 | 0.84 | 1.10  | 0.32 | 0.68 | 1.06  |
| IKK-beta_Y199    | 0.27 | 0.73 | 1.07  | 0.09 | 0.91 | 1.22  | 0.09 | 0.91 | 1.21  |
| IKK-gamma_S31    | 0.29 | 0.71 | 1.22  | 0.00 | 1.00 | 1.37  | 0.02 | 0.98 | 2.00  |

|                  |      |      |       |      |      |       |      |      |       |
|------------------|------|------|-------|------|------|-------|------|------|-------|
| IKK-gamma_S43    | 0.33 | 0.67 | 1.06  | 0.23 | 0.77 | 1.07  | 0.30 | 0.70 | 1.07  |
| IL-10R-A_Y496    | 0.85 | 0.15 | -1.14 | 0.19 | 0.81 | 1.11  | 0.65 | 0.35 | -1.07 |
| IL-16_S143/4     | 0.16 | 0.84 | 1.17  | 0.10 | 0.90 | 1.20  | 0.17 | 0.83 | 1.19  |
| IL1A_S87         | 0.24 | 0.76 | 1.15  | 0.15 | 0.85 | 1.14  | 0.30 | 0.70 | 1.12  |
| IL2RB_Y364       | 0.82 | 0.18 | -1.12 | 0.31 | 0.69 | 1.05  | 0.70 | 0.30 | -1.09 |
| IL2RB_Y536       | 0.73 | 0.27 | -1.09 | 0.24 | 0.76 | 1.10  | 0.48 | 0.52 | 1.01  |
| IL4R_Y713        | 0.31 | 0.69 | 1.08  | 0.14 | 0.86 | 1.16  | 0.39 | 0.61 | 1.05  |
| IL7R_Y449        | 0.18 | 0.82 | 1.16  | 0.07 | 0.93 | 1.16  | 0.18 | 0.82 | 1.18  |
| IL-8R-B_S347     | 0.45 | 0.55 | 1.01  | 0.93 | 0.07 | -1.12 | 0.75 | 0.25 | -1.05 |
| IL-8R-B_S351/2/3 | 0.77 | 0.23 | -1.07 | 0.97 | 0.03 | -1.15 | 0.51 | 0.49 | -1.00 |
| iNOS_S739        | 0.82 | 0.18 | -1.10 | 1.00 | 0.00 | -1.24 | 0.96 | 0.04 | -1.24 |
| iNOS_S909        | 0.70 | 0.30 | -1.08 | 0.98 | 0.02 | -1.20 | 0.97 | 0.03 | -1.25 |
| iNOS_Y151        | 0.91 | 0.09 | -1.18 | 0.97 | 0.03 | -1.26 | 1.00 | 0.00 | -1.43 |
| IRAK1_S376       | 0.47 | 0.53 | 1.03  | 0.30 | 0.70 | 1.05  | 0.02 | 0.98 | 1.54  |
| IRAK1_S568       | 0.56 | 0.44 | -1.03 | 0.80 | 0.20 | -1.09 | 0.22 | 0.78 | 1.10  |
| IRAK1_T100       | 0.75 | 0.25 | -1.13 | 0.03 | 0.97 | 1.20  | 0.01 | 0.99 | 1.26  |
| IRAK1_T209       | 0.27 | 0.73 | 1.08  | 0.72 | 0.28 | -1.04 | 0.49 | 0.51 | 1.00  |
| IRAK1_T387       | 0.69 | 0.31 | -1.07 | 0.55 | 0.45 | -1.01 | 0.27 | 0.73 | 1.06  |
| IRF-3_S385/6     | 0.52 | 0.48 | -1.00 | 0.10 | 0.90 | 1.12  | 0.38 | 0.62 | 1.03  |
| IRF-3_S396/8     | 0.49 | 0.51 | 1.00  | 0.26 | 0.74 | 1.05  | 0.43 | 0.57 | 1.02  |
| IRF-3_S402/5     | 0.52 | 0.48 | -1.00 | 0.20 | 0.80 | 1.05  | 0.22 | 0.78 | 1.07  |
| IRF-5_S437       | 0.33 | 0.67 | 1.04  | 0.01 | 0.99 | 1.12  | 0.14 | 0.86 | 1.10  |
| ITK_Y512         | 0.43 | 0.57 | 1.02  | 0.63 | 0.37 | -1.02 | 0.53 | 0.47 | -1.01 |
| Jak1_Y1022/3     | 0.88 | 0.12 | -1.16 | 0.42 | 0.58 | 1.03  | 0.90 | 0.10 | -1.21 |
| Jak2_Y1007/8     | 0.78 | 0.22 | -1.08 | 0.56 | 0.44 | -1.01 | 0.86 | 0.14 | -1.11 |
| Jak3_Y981        | 0.98 | 0.02 | -1.27 | 0.64 | 0.36 | -1.02 | 0.89 | 0.11 | -1.15 |
| JIP1_T103        | 0.48 | 0.52 | 1.01  | 0.99 | 0.01 | -1.15 | 0.90 | 0.10 | -1.12 |
| JNK1_NA          | 0.72 | 0.28 | -1.10 | 0.93 | 0.07 | -1.15 | 0.26 | 0.74 | 1.11  |
| JNK1_S377        | 0.38 | 0.62 | 1.05  | 0.19 | 0.81 | 1.15  | 0.06 | 0.94 | 1.16  |
| JNK2_S129        | 0.69 | 0.31 | -1.07 | 0.69 | 0.31 | -1.05 | 0.12 | 0.88 | 1.18  |
| JNK2_T404/7      | 0.19 | 0.81 | 1.07  | 0.48 | 0.52 | 1.00  | 0.32 | 0.68 | 1.04  |
| JNK3_T131        | 0.22 | 0.78 | 1.09  | 0.92 | 0.08 | -1.12 | 0.46 | 0.54 | 1.01  |
| Jun_S63          | 0.76 | 0.24 | -1.08 | 0.06 | 0.94 | 1.33  | 0.38 | 0.62 | 1.06  |
| Jun_S73          | 0.61 | 0.39 | -1.04 | 0.40 | 0.60 | 1.04  | 0.63 | 0.37 | -1.05 |
| Kit_S821         | 0.86 | 0.14 | -1.14 | 0.74 | 0.26 | -1.09 | 0.99 | 0.01 | -1.31 |
| Kit_Y721         | 0.18 | 0.82 | 1.10  | 0.29 | 0.71 | 1.04  | 0.56 | 0.44 | -1.01 |
| LEF-1_S166       | 0.91 | 0.09 | -1.16 | 0.81 | 0.19 | -1.05 | 0.86 | 0.14 | -1.06 |
| LEF-1_T155       | 0.20 | 0.80 | 1.13  | 0.25 | 0.75 | 1.07  | 0.22 | 0.78 | 1.12  |
| LRRFIP1_S497     | 0.77 | 0.23 | -1.05 | 0.81 | 0.19 | -1.06 | 0.53 | 0.47 | -1.00 |
| LRRFIP1_S690     | 0.17 | 0.83 | 1.05  | 0.55 | 0.45 | -1.01 | 0.52 | 0.48 | -1.00 |
| Lyn_Y507         | 0.28 | 0.72 | 1.07  | 0.93 | 0.07 | -1.15 | 0.72 | 0.28 | -1.07 |

|                   |      |      |       |      |      |       |      |      |       |
|-------------------|------|------|-------|------|------|-------|------|------|-------|
| MEK1_S217         | 0.93 | 0.07 | -1.25 | 0.43 | 0.57 | 1.02  | 0.62 | 0.38 | -1.03 |
| MEK2_Y216         | 0.28 | 0.72 | 1.13  | 0.06 | 0.94 | 1.33  | 0.01 | 0.99 | 1.43  |
| MEK5_S311/15      | 0.62 | 0.38 | -1.05 | 0.74 | 0.26 | -1.08 | 0.66 | 0.34 | -1.06 |
| MEKK1_T1383       | 0.45 | 0.55 | 1.01  | 0.63 | 0.37 | -1.03 | 0.87 | 0.13 | -1.11 |
| Met_Y1234/5       | 0.17 | 0.83 | 1.14  | 0.45 | 0.55 | 1.01  | 0.42 | 0.58 | 1.02  |
| Met_Y1349         | 0.44 | 0.56 | 1.03  | 0.23 | 0.77 | 1.07  | 0.42 | 0.58 | 1.03  |
| MKP-1_S296        | 0.66 | 0.34 | -1.12 | 0.70 | 0.30 | -1.04 | 0.12 | 0.88 | 1.22  |
| MKP-1_S323        | 0.22 | 0.78 | 1.11  | 0.09 | 0.91 | 1.17  | 0.12 | 0.88 | 1.16  |
| MKP-1_S359        | 0.93 | 0.07 | -1.13 | 0.05 | 0.95 | 1.33  | 0.22 | 0.78 | 1.11  |
| MLK3_NA           | 0.42 | 0.58 | 1.05  | 0.80 | 0.20 | -1.11 | 0.07 | 0.93 | 1.35  |
| Mos_S25           | 0.91 | 0.09 | -1.32 | 0.63 | 0.37 | -1.04 | 0.97 | 0.03 | -1.21 |
| MSK1_T581         | 0.80 | 0.20 | -1.14 | 0.92 | 0.08 | -1.10 | 0.97 | 0.03 | -1.25 |
| MSK2_S196         | 0.60 | 0.40 | -1.03 | 0.99 | 0.01 | -1.16 | 0.98 | 0.02 | -1.24 |
| MSK2_S347         | 0.35 | 0.65 | 1.05  | 0.93 | 0.07 | -1.06 | 0.90 | 0.10 | -1.12 |
| mucin-1_T1224/7/9 | 0.37 | 0.63 | 1.04  | 0.96 | 0.04 | -1.17 | 0.73 | 0.27 | -1.07 |
| NFAT1_S168        | 0.87 | 0.13 | -1.17 | 0.30 | 0.70 | 1.05  | 0.87 | 0.13 | -1.14 |
| NFAT1_S326        | 0.45 | 0.55 | 1.02  | 0.05 | 0.95 | 1.15  | 0.03 | 0.97 | 1.28  |
| NFAT2_S294        | 0.05 | 0.95 | 1.14  | 0.14 | 0.86 | 1.14  | 0.03 | 0.97 | 1.20  |
| NFAT4_S163/5      | 0.56 | 0.44 | -1.02 | 0.77 | 0.23 | -1.10 | 0.84 | 0.16 | -1.12 |
| NFkB-p100_S865    | 0.16 | 0.84 | 1.21  | 0.09 | 0.91 | 1.12  | 0.03 | 0.97 | 1.31  |
| NFkB-p100_S869/71 | 0.61 | 0.39 | -1.05 | 0.73 | 0.27 | -1.12 | 0.67 | 0.33 | -1.07 |
| NFkB-p105_S337    | 0.38 | 0.62 | 1.05  | 0.04 | 0.96 | 1.21  | 0.04 | 0.96 | 1.20  |
| NFkB-p105_S907    | 0.33 | 0.67 | 1.09  | 0.20 | 0.80 | 1.11  | 0.19 | 0.81 | 1.15  |
| NFkB-p65_S276     | 0.28 | 0.72 | 1.15  | 0.00 | 1.00 | 1.23  | 0.05 | 0.95 | 1.28  |
| NFkB-p65_S311     | 0.63 | 0.37 | -1.07 | 0.02 | 0.98 | 1.26  | 0.11 | 0.89 | 1.28  |
| NFkB-p65_S536     | 0.40 | 0.60 | 1.04  | 0.23 | 0.77 | 1.07  | 0.13 | 0.87 | 1.11  |
| NGFR_Y336         | 0.73 | 0.27 | -1.08 | 0.40 | 0.60 | 1.03  | 0.48 | 0.52 | 1.01  |
| Nik_T559          | 0.49 | 0.51 | 1.00  | 0.39 | 0.61 | 1.02  | 0.86 | 0.14 | -1.10 |
| Notch-2_S2070     | 0.58 | 0.42 | -1.02 | 0.70 | 0.30 | -1.05 | 0.82 | 0.18 | -1.07 |
| Notch-2_T1808     | 0.55 | 0.45 | -1.01 | 0.42 | 0.58 | 1.02  | 0.73 | 0.27 | -1.07 |
| p300_S1834        | 0.06 | 0.94 | 1.21  | 0.10 | 0.90 | 1.07  | 0.00 | 1.00 | 1.30  |
| p300_S893         | 0.45 | 0.55 | 1.05  | 0.05 | 0.95 | 1.13  | 0.05 | 0.95 | 1.60  |
| P38-gamma_T183/5  | 0.23 | 0.77 | 1.09  | 0.51 | 0.49 | -1.00 | 0.03 | 0.97 | 1.19  |
| p38-alpha_T180/2  | 0.30 | 0.70 | 1.07  | 0.09 | 0.91 | 1.10  | 0.19 | 0.81 | 1.08  |
| p38-alpha_Y323    | 0.22 | 0.78 | 1.11  | 0.67 | 0.33 | -1.03 | 0.86 | 0.14 | -1.12 |
| p40phox_T154      | 0.62 | 0.38 | -1.05 | 0.73 | 0.27 | -1.06 | 0.59 | 0.41 | -1.04 |
| p47phox_S370      | 0.50 | 0.50 | -1.00 | 0.45 | 0.55 | 1.01  | 0.04 | 0.96 | 1.46  |
| p53_S215          | 0.67 | 0.33 | -1.06 | 0.96 | 0.04 | -1.27 | 0.88 | 0.12 | -1.12 |
| p53_S6/9          | 0.24 | 0.76 | 1.06  | 0.95 | 0.05 | -1.14 | 0.98 | 0.02 | -1.13 |

|                |      |      |       |      |      |       |      |      |       |
|----------------|------|------|-------|------|------|-------|------|------|-------|
| p70S6Kb_S473/4 | 0.30 | 0.70 | 1.06  | 0.83 | 0.17 | -1.09 | 0.47 | 0.53 | 1.01  |
| PDGFRb_Y579/81 | 0.18 | 0.82 | 1.14  | 0.11 | 0.89 | 1.10  | 0.24 | 0.76 | 1.07  |
| PDGFRb_Y740    | 0.28 | 0.72 | 1.08  | 0.59 | 0.41 | -1.01 | 0.84 | 0.16 | -1.09 |
| PIK3R1_S608/7  | 0.61 | 0.39 | -1.04 | 0.65 | 0.35 | -1.04 | 0.92 | 0.08 | -1.16 |
| PKACa_S338     | 0.28 | 0.72 | 1.08  | 0.25 | 0.75 | 1.08  | 0.45 | 0.55 | 1.02  |
| PKACa_T195/7   | 0.12 | 0.88 | 1.17  | 0.03 | 0.97 | 1.17  | 0.14 | 0.86 | 1.14  |
| PKCA_S656      | 0.79 | 0.21 | -1.09 | 0.96 | 0.04 | -1.22 | 1.00 | 0.00 | -1.34 |
| PKCA_T637      | 0.73 | 0.27 | -1.08 | 1.00 | 0.00 | -1.23 | 0.84 | 0.16 | -1.10 |
| PKCB_S15/T16   | 0.36 | 0.64 | 1.07  | 0.84 | 0.16 | -1.11 | 0.39 | 0.61 | 1.06  |
| PKCB_T323      | 0.12 | 0.88 | 1.19  | 0.73 | 0.27 | -1.08 | 0.50 | 0.50 | 1.00  |
| PKCE_S729      | 0.90 | 0.10 | -1.18 | 0.96 | 0.04 | -1.21 | 0.75 | 0.25 | -1.09 |
| PKCE_T710      | 0.28 | 0.72 | 1.09  | 0.58 | 0.42 | -1.01 | 0.16 | 0.84 | 1.16  |
| PKCT_T219      | 0.58 | 0.42 | -1.03 | 0.94 | 0.06 | -1.16 | 0.74 | 0.26 | -1.10 |
| PKCT_Y90       | 0.91 | 0.09 | -1.19 | 1.00 | 0.00 | -1.29 | 0.98 | 0.02 | -1.39 |
| PKG1_T58       | 0.81 | 0.19 | -1.15 | 0.93 | 0.07 | -1.22 | 0.47 | 0.53 | 1.01  |
| PKR_T446       | 0.05 | 0.95 | 1.37  | 0.18 | 0.82 | 1.09  | 0.12 | 0.88 | 1.21  |
| PKR_T451       | 0.53 | 0.47 | -1.01 | 0.16 | 0.84 | 1.08  | 0.46 | 0.54 | 1.01  |
| PLCB1_S887     | 0.44 | 0.56 | 1.03  | 0.08 | 0.92 | 1.10  | 0.15 | 0.85 | 1.13  |
| PLCB1_S887     | 0.21 | 0.79 | 1.20  | 0.37 | 0.63 | 1.04  | 0.22 | 0.78 | 1.15  |
| PLCG1_Y472     | 0.51 | 0.49 | -1.00 | 0.41 | 0.59 | 1.02  | 0.57 | 0.43 | -1.02 |
| PLCG1_Y771     | 0.71 | 0.29 | -1.06 | 0.95 | 0.05 | -1.10 | 0.92 | 0.08 | -1.14 |
| PLCG1_Y783     | 0.62 | 0.38 | -1.04 | 0.02 | 0.98 | 1.14  | 0.05 | 0.95 | 1.17  |
| PPARG_S112     | 0.46 | 0.54 | 1.01  | 0.95 | 0.05 | -1.13 | 0.97 | 0.03 | -1.15 |
| PPP2CA_T304/7  | 1.00 | 0.00 | -1.73 | 0.98 | 0.02 | -1.33 | 1.00 | 0.00 | -1.78 |
| PTP1B_S50      | 0.76 | 0.24 | -1.18 | 0.08 | 0.92 | 1.15  | 0.06 | 0.94 | 1.30  |
| PXN_Y31        | 0.24 | 0.76 | 1.10  | 0.10 | 0.90 | 1.12  | 0.09 | 0.91 | 1.09  |
| Pyk2_Y402      | 0.46 | 0.54 | 1.02  | 0.24 | 0.76 | 1.09  | 0.53 | 0.47 | -1.01 |
| RAC1_S71       | 0.37 | 0.63 | 1.04  | 0.44 | 0.56 | 1.01  | 0.81 | 0.19 | -1.09 |
| Raf1_S259      | 0.70 | 0.30 | -1.06 | 0.99 | 0.01 | -1.35 | 0.34 | 0.66 | 1.06  |
| Raf1_S499      | 0.25 | 0.75 | 1.05  | 0.98 | 0.02 | -1.19 | 0.38 | 0.62 | 1.02  |
| RasGAP_Y460    | 0.76 | 0.24 | -1.09 | 0.98 | 0.02 | -1.11 | 0.99 | 0.01 | -1.12 |
| Rb_S780        | 0.23 | 0.77 | 1.11  | 0.24 | 0.76 | 1.08  | 0.05 | 0.95 | 1.32  |
| Rb_S795        | 0.29 | 0.71 | 1.08  | 0.30 | 0.70 | 1.02  | 0.09 | 0.91 | 1.18  |
| RBL2_SYMSP_NA  | 0.27 | 0.73 | 1.05  | 1.00 | 0.00 | -1.18 | 0.69 | 0.31 | -1.03 |
| RelB_S573      | 0.54 | 0.46 | -1.01 | 0.04 | 0.96 | 1.20  | 0.51 | 0.49 | -1.00 |
| RhoA_S188      | 0.46 | 0.54 | 1.02  | 0.09 | 0.91 | 1.30  | 0.20 | 0.80 | 1.21  |
| RIPK1_Y384/7/9 | 0.13 | 0.87 | 1.17  | 0.02 | 0.98 | 1.29  | 0.01 | 0.99 | 1.38  |
| ROCK2_S1134/7  | 0.59 | 0.41 | -1.02 | 0.70 | 0.30 | -1.07 | 0.86 | 0.14 | -1.07 |
| SEK1_S257/0    | 0.44 | 0.56 | 1.01  | 0.19 | 0.81 | 1.08  | 0.55 | 0.45 | -1.01 |
| SEK1_S80       | 0.41 | 0.59 | 1.04  | 0.30 | 0.70 | 1.10  | 0.35 | 0.65 | 1.07  |
| Shc1_Y349/0    | 0.52 | 0.48 | -1.01 | 0.97 | 0.03 | -1.16 | 0.92 | 0.08 | -1.10 |

|                |      |      |       |      |      |       |      |      |       |
|----------------|------|------|-------|------|------|-------|------|------|-------|
| Smad1_S462/3/5 | 0.28 | 0.72 | 1.16  | 0.04 | 0.96 | 1.22  | 0.04 | 0.96 | 1.48  |
| Smad2_S255     | 0.27 | 0.73 | 1.10  | 0.04 | 0.96 | 1.23  | 0.16 | 0.84 | 1.18  |
| Smad2_T8       | 0.52 | 0.48 | -1.01 | 0.04 | 0.96 | 1.33  | 0.08 | 0.92 | 1.38  |
| Smad3_S208     | 0.15 | 0.85 | 1.16  | 0.01 | 0.99 | 1.24  | 0.02 | 0.98 | 1.49  |
| Smad3_S422/3/5 | 0.32 | 0.68 | 1.11  | 0.12 | 0.88 | 1.12  | 0.01 | 0.99 | 1.30  |
| smMLCK_S1773   | 0.33 | 0.67 | 1.07  | 0.35 | 0.65 | 1.05  | 0.11 | 0.89 | 1.10  |
| SOD1_S98       | 0.71 | 0.29 | -1.07 | 0.73 | 0.27 | -1.05 | 0.87 | 0.13 | -1.10 |
| Src_S74        | 0.30 | 0.70 | 1.04  | 0.94 | 0.06 | -1.13 | 0.58 | 0.42 | -1.01 |
| Src_S96        | 0.57 | 0.43 | -1.03 | 0.61 | 0.39 | -1.03 | 0.78 | 0.22 | -1.11 |
| SRF_S77/79     | 0.07 | 0.93 | 1.12  | 0.95 | 0.05 | -1.10 | 1.00 | 0.00 | -1.12 |
| STAT1_S727     | 0.21 | 0.79 | 1.09  | 0.28 | 0.72 | 1.05  | 0.60 | 0.40 | -1.03 |
| STAT1_Y701     | 0.14 | 0.86 | 1.20  | 0.08 | 0.92 | 1.22  | 0.01 | 0.99 | 1.35  |
| STAT2_Y690     | 0.92 | 0.08 | -1.15 | 0.06 | 0.94 | 1.13  | 0.39 | 0.61 | 1.04  |
| STAT3_S727     | 0.54 | 0.46 | -1.02 | 0.03 | 0.97 | 1.36  | 0.25 | 0.75 | 1.09  |
| STAT3_Y705     | 0.84 | 0.16 | -1.12 | 0.05 | 0.95 | 1.16  | 0.28 | 0.72 | 1.09  |
| STAT4_S721     | 0.66 | 0.34 | -1.06 | 0.09 | 0.91 | 1.17  | 0.81 | 0.19 | -1.15 |
| STAT4_Y693     | 0.45 | 0.55 | 1.02  | 0.07 | 0.93 | 1.26  | 0.17 | 0.83 | 1.18  |
| STAT5B_S731    | 0.47 | 0.53 | 1.01  | 0.45 | 0.55 | 1.02  | 0.68 | 0.32 | -1.06 |
| STAT5B_Y699    | 0.49 | 0.51 | 1.00  | 0.05 | 0.95 | 1.14  | 0.07 | 0.93 | 1.15  |
| STAT6_Y641     | 0.86 | 0.14 | -1.40 | 0.00 | 1.00 | 1.22  | 0.11 | 0.89 | 1.25  |
| STMN1_S15      | 0.79 | 0.21 | -1.07 | 0.41 | 0.59 | 1.02  | 0.41 | 0.59 | 1.03  |
| STMN1_S62      | 0.35 | 0.65 | 1.05  | 0.18 | 0.82 | 1.16  | 0.01 | 0.99 | 1.35  |
| Syk_Y525/6     | 0.65 | 0.35 | -1.04 | 0.10 | 0.90 | 1.12  | 0.24 | 0.76 | 1.06  |
| TAK1_S192      | 0.21 | 0.79 | 1.18  | 0.28 | 0.72 | 1.08  | 0.00 | 1.00 | 1.48  |
| TAK1_T184      | 0.33 | 0.67 | 1.04  | 0.03 | 0.97 | 1.12  | 0.16 | 0.84 | 1.09  |
| TBK1_S172      | 0.62 | 0.38 | -1.04 | 0.78 | 0.22 | -1.06 | 0.76 | 0.24 | -1.08 |
| TNF-R1_S274    | 0.58 | 0.42 | -1.02 | 0.99 | 0.01 | -1.19 | 0.79 | 0.21 | -1.11 |
| TNFRSF5_T254   | 0.65 | 0.35 | -1.05 | 0.96 | 0.04 | -1.09 | 0.97 | 0.03 | -1.16 |
| TNIK_S764      | 0.82 | 0.18 | -1.14 | 1.00 | 0.00 | -1.35 | 0.80 | 0.20 | -1.10 |
| TNIK_T987      | 0.78 | 0.22 | -1.09 | 1.00 | 0.00 | -1.26 | 1.00 | 0.00 | -1.41 |
| TPH1_S58       | 0.99 | 0.01 | -1.41 | 0.97 | 0.03 | -1.24 | 0.98 | 0.02 | -1.30 |
| TrkB_Y706/7    | 0.12 | 0.88 | 1.15  | 0.12 | 0.88 | 1.08  | 0.05 | 0.95 | 1.16  |
| TrkC_Y516      | 0.35 | 0.65 | 1.08  | 0.41 | 0.59 | 1.03  | 0.12 | 0.88 | 1.25  |
| Tyk2_Y1054/5   | 0.57 | 0.43 | -1.03 | 0.15 | 0.85 | 1.04  | 0.55 | 0.45 | -1.02 |
| VASP_S156      | 0.30 | 0.70 | 1.14  | 0.66 | 0.34 | -1.07 | 0.15 | 0.85 | 1.32  |
| VEGFR-1_Y1169  | 0.82 | 0.18 | -1.20 | 0.46 | 0.54 | 1.01  | 0.76 | 0.24 | -1.12 |
| VEGFR-2_Y1214  | 0.51 | 0.49 | -1.00 | 0.01 | 0.99 | 1.21  | 0.53 | 0.47 | -1.01 |
| VEGFR3_Y1265   | 0.94 | 0.06 | -1.18 | 0.88 | 0.12 | -1.08 | 0.58 | 0.42 | -1.02 |
| VEGFR3_Y130/1  | 0.56 | 0.44 | -1.04 | 0.03 | 0.97 | 1.36  | 0.42 | 0.58 | 1.04  |
| VIM_S39        | 0.20 | 0.80 | 1.08  | 0.95 | 0.05 | -1.15 | 0.45 | 0.55 | 1.02  |
| WASP_Y291      | 0.79 | 0.21 | -1.08 | 0.19 | 0.81 | 1.06  | 0.63 | 0.37 | -1.03 |

|          |      |      |       |      |      |      |      |      |      |
|----------|------|------|-------|------|------|------|------|------|------|
| XIAP_S87 | 0.83 | 0.17 | -1.12 | 0.02 | 0.98 | 1.15 | 0.31 | 0.69 | 1.05 |
|----------|------|------|-------|------|------|------|------|------|------|

**Table S2: Complete data set of peptides from MAP kinome.** Table shows kinome results from IFN, MAP+IFN, and MAP relative to the Mono control (no treatment). For each of these peptides, the responses from all three animals were pooled to increase the statistical confidence. The *p* up columns indicate confidence of increased phosphorylation relative to control, *p* down columns indicate confidence of decreased phosphorylation relative to control and FC indicates the relative fold change of phosphorylation relative to control.

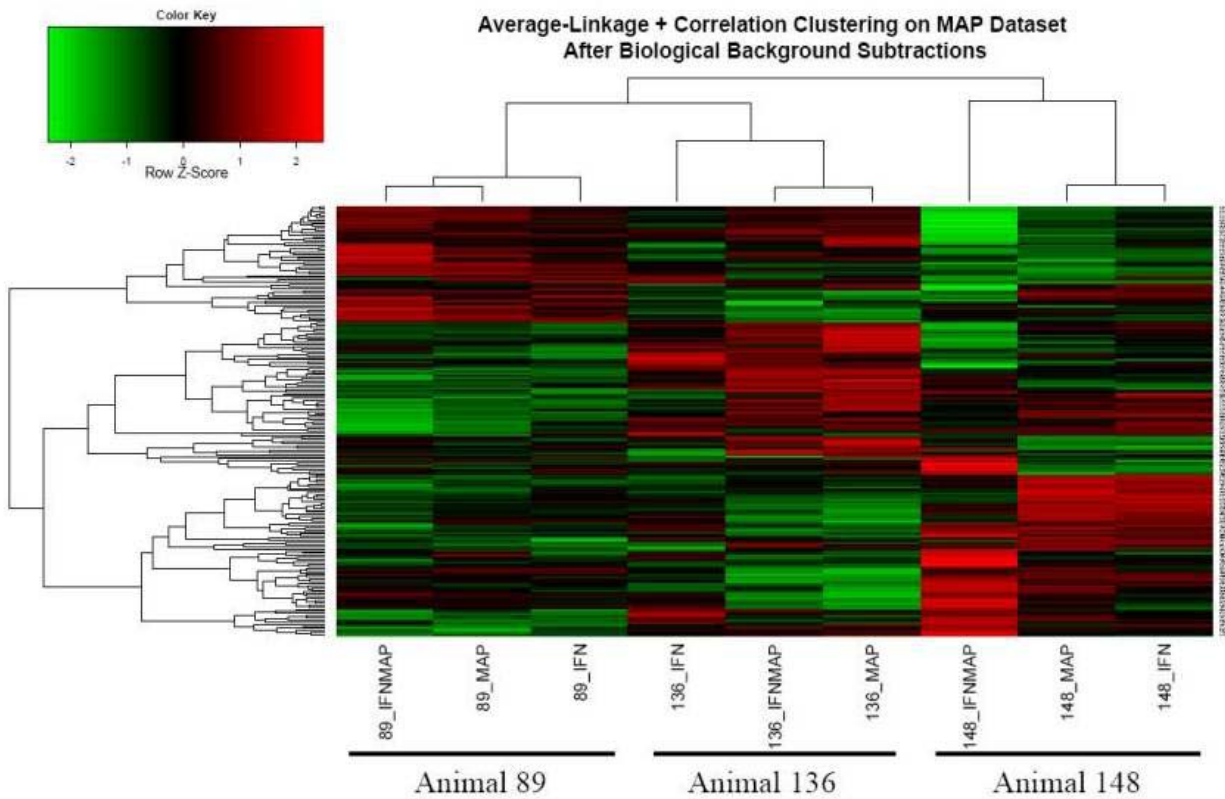

Figure S1: Clustering and Heat Map of Kinome Data. Kinome data sets were subjected to hierarchical clustering analysis. “Average Linkage + (1 - Pearson Correlation)” was used for clustering both the animal-treatments (in vertical direction) and the peptides (in horizontal direction). The animal codes are indicated right below the corresponding treatment names under the heat map.
